# Supplementary material
Source: PubMed Central journal article supplement (PMC4339399)

# Supplementary figure 1

A

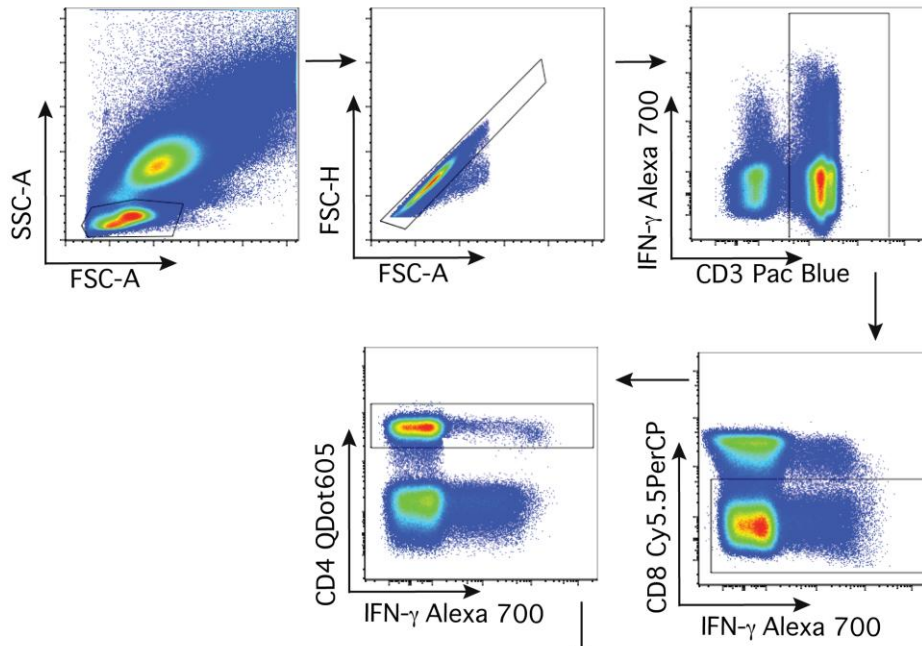

B

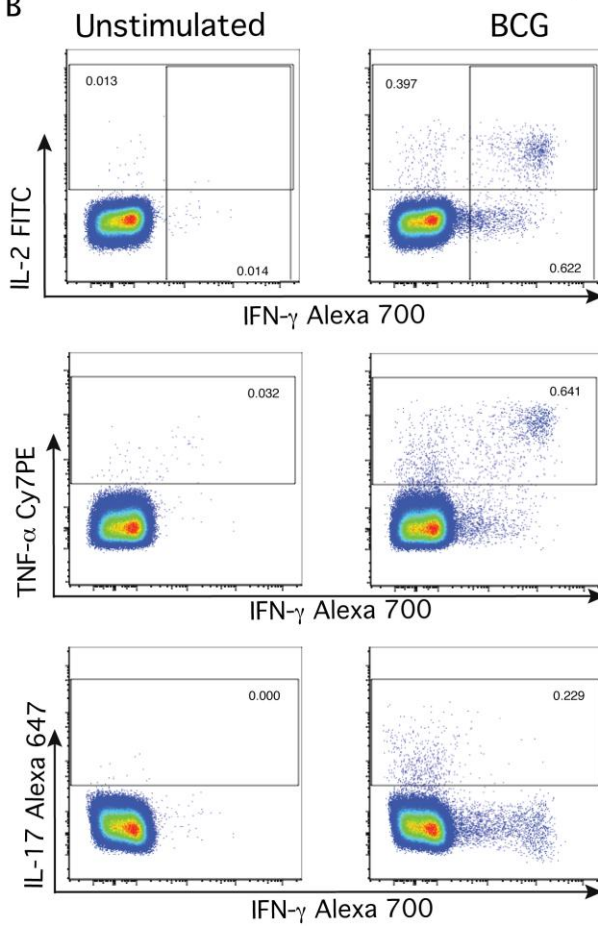

Supplement: NIHMS650667-supplement-1.pdf [file NIHMS650667-supplement-1.pdf]
